# 1 **Comparative Transcriptomic Analysis Revealed Complex** 2 **Molecular Mechanisms Underlying Pests, Pathogens Resistance** 3 **and Seed Development in Wild and Cultivated Blackgram**

4 Avi Raizada<sup>12</sup> and Souframanien Jegadeesan<sup>12\*</sup>

5 <sup>1</sup> Homi Bhabha National Institute, Training School Complex, Anushaktinagar, Mumbai-  
6 400094, India.

7 <sup>2</sup> Nuclear Agriculture and Biotechnology Division, Bhabha Atomic Research Centre, Trombay,  
8 Mumbai-400085, India.

9 \*Corresponding author: [souf@barc.gov.in](mailto:souf@barc.gov.in)

## 10 **Abstract**

11 Blackgram is a widely cultivated pulse crop in Asia. Bruchid pests and yellow mosaic disease  
12 (YMD) causes huge loss in legume production including blackgram. Blackgram wild accession  
13 (*Vigna mungo* var. *silvestris*), Trombay wild urd (INGR10133) conferred resistance to bruchids  
14 especially *Callosobruchus maculatus*, through antibiosis. However, the mechanisms still  
15 remains uncharacterized. We performed the comparative transcriptome analysis of the  
16 developing seeds of wild and cultivated blackgram with contrasting phenotypes for 3 traits,  
17 bruchids infestation, YMD and seed size. In this study, 715 differentially expressed  
18 genes (DEGs) were re-annotated with reference to NCBI nr database. RNA-Seq was validated  
19 by quantitative real-time PCR for 22 DEGs. In Trombay wild, defense related components  
20 such as acid phosphatase, vicilins, trypsin inhibitor, brassinosteroid signalling components  
21 were found up-regulated. While in cultivar, transcripts for *LEA*, cysteine protease, autophagy  
22 related proteins (*ATG3*, *ATG5*, *ATG8C* and *ATG11*), *DnaJ*, tobamovirus multiplication protein,  
23 downy mildew resistance protein, LRR/F-box proteins were found up-regulated. In TW, three  
24 transcripts were found common for both bruchids pest and geminivirus resistance (LRR  
25 receptor kinase, transmembrane protein 87b and thaumatin like protein). Our study is the first  
26 report on transcriptomic differences between wild and cultivated blackgram with new insights  
27 into the molecular networks underlying seed development, resistance to pests and pathogens.

28

## 29 **Keywords**

30 Blackgram, Wild, RNA-Seq, Quantitative reverse transcription Polymerase chain reaction,  
31 Bruchids, Pests, Geminivirus, Seed development

## 32 **Introduction**

33 Blackgram [*Vigna mungo* (L) Hepper] is an important pulse crop domesticated from *Vigna*  
34 *mungo* var. *silvestris*. It is extensively cultivated for its proteinaceous seeds and as a  
35 component of various cropping systems in South Asian regions including India, Myanmar,  
36 Pakistan, Bangladesh and Thailand and highly demanded by the sprout industry of Thailand  
37 and Japan [1]. Yield potential of grain legumes depends on seed features and tolerance to biotic  
38 and abiotic stresses. Production of blackgram is severely affected by pathogens in field and by  
39 pests during storage especially by Yellow mosaic disease (YMD) [2] and bruchid pests [3]  
40 respectively. YMD is the most devastating disease of legumes caused by *Yellow mosaic virus*  
41 (YMV) and spread by vector whitefly (*Bemisia tabaci*) while among bruchid pests,  
42 *Callosobruchus maculatus* are the most common damage causing agents of stored seeds.

43 In blackgram, among several reported YMD resistance sources, TU94-2 is a well-known elite  
44 cultivar resistant to MYMV (*Mungbean yellow mosaic virus*) [4] and among very few bruchid  
45 resistance sources reported [5,6], wild accession (*V. mungo* var. *silvestris*) is a well-known  
46 resistance source [7] but remained unstudied. Trombay wild blackgram (INGR10133) (TW) is one  
47 of the blackgram wild accessions studied in this report which is native to Trombay hills, India. In  
48 TW, the resistance trait is controlled by two dominant duplicate genes and resistance mechanism  
49 was observed to be larval antibiosis with the constitutive expression of resistance factors resulting  
50 in reduced survival, longer developmental period (88 days as compared with 34 days on TU 94-2)  
51 and reduced body weight of *C. maculatus* [8,9]. Compared to other legumes, very few reports are  
52 available in blackgram related to YMD and bruchids [4,5,8,10-14]. Very few studies attempted to  
53 understand the transcriptome dynamics of blackgram upon YMV and bruchids attack [15-19]  
54 resulting in identification of several defense genes such as defensin, pathogenesis related protein  
55 (*PR*) and lipoxygenase (*LOX*) that might be involved in resistance mechanism to pests and  
56 pathogens. Through these studies, a foundation to future research has been laid but the molecular  
57 mechanisms involved in the resistance to YMV and bruchids still remain incompletely understood.  
58 Next-generation sequencing (NGS) technology has been widely used in plant biology for  
59 understanding of plant responses under various conditions and in different genetic background  
60 [19,20]. Advances in sequencing technology especially RNA-Seq have presented opportunities  
61 for comparative transcriptome profiling [17,21,22] for both model and non-model organisms.

62 Several studies reported plant responses to oviposition/bruchids, which are under inducible  
63 expression such as neoplastic tissue growth to cast off eggs [23], synthesis of ovicidal  
64 compounds [24], release of volatile substance from the leaves that attract parasitoids to kill the  
65 eggs [25] and activation of defense genes in response to elicitors such as oral/ovipositor  
66 secretions which acts as herbivore associated molecular patterns (HAMPs) [17,26] but no  
67 reports are available on constitutive expression of defense response genes in absence of  
68 bruchids.

69 Plant employed growth-defense trade-off scheme for appropriate use of limited resources  
70 according to prevailing conditions such as pathogens/pests attack which leads to suppressed  
71 growth and development and activation of defense responses to cope up [27,28]. Numerous  
72 studies claimed the involvement of several hormone pathways and leucine-rich repeat receptor  
73 kinases in defense response [28-31], very little is known about molecular mechanisms  
74 regulating growth-defense trade-offs. Here, we report the comparative transcriptome analysis  
75 of wild and cultivated blackgram with contrasting phenotypes for 3 traits: YMD, bruchid  
76 resistance and seed size (TW – 2gms/100 seeds and TU94-2 –4.5gms/100seeds). Present study  
77 was conducted on developing seeds from YMD and bruchid non-infected plants, which aimed  
78 at exploring transcriptional network and genes involved in resistance mechanism under  
79 constitutive expression. We also validated the RNA-Seq results through quantitative real-time  
80 PCR (qRT-PCR). Moreover, this study enlightens the transcriptional differences related to  
81 innate immune system and seed development of wild and cultivated blackgram.

## 82 **Materials and Methods**

### 83 **Plant material**

84 The wild accession of blackgram(*Vigna mungo* var. *silvestris*) Trombay wild and TU94-2  
85 (*Vigna mungo* var. *mungo*) are maintained at Nuclear Agriculture and Biotechnology Division,  
86 Bhabha Atomic Research Centre, Trombay, Mumbai, India. They were grown at the  
87 experimental field facility of the Institute at Trombay, Mumbai(latitude 18:54N, longitude  
88 72:49E).

### 89 **Transcriptome sequencing, assembly, annotation, DEGs prediction and characterization**

90 Sample preparation from 12 immature seeds of 4 different plants of Trombay wild and TU94-2  
91 harvested 4 weeks after flowering and sequencing was done on Illumina MiSeq platform in a  
92 single lane using paired end sequencing chemistry (Xcelris Genomics Ltd. Ahmedabad)

93 [14,32]. Sequencing raw data was processed further to remove adaptor contamination and low  
94 quality reads (QV<20) using Trimmomatic v0.30 and high quality reads were assembled using  
95 CLC Genomics Workbench with default parameters [14,32]. After assembly, sequence data  
96 was submitted to NCBI database with ID. SRR 5931432, SRX3091690 (study accession  
97 SRP115376) for TW and SRR 1616991, SRX710526 (study accession SRP 047502) for TU94-2  
98 by the same authors [14,32]. CDS were identified using ORF-predictor with the selection of  
99 longest frame and annotated using BLASTx with reference to green plant database with  
100 significant similarity (evaluate  $\leq 1e-5$ ) [14,32]. After annotation CDS were mapped to Gene  
101 Ontology (GO) and KEGG (Kyoto Encyclopedia of Genes and Genomes) database  
102 (<http://www.genome.jp/kegg>). DEGs identification using CLC and FPKM calculation and  
103 classification as up and down regulated based on log fold change (FC) values were also done  
104 and reported by the same authors [14,32].

#### 105 **Reannotation of DEGs**

106 In the previous study, on wild blackgram transcriptome sequencing, CDS (DEGs) identified  
107 through comparison between wild and cultivated blackgram were annotated based on green  
108 plant database which resulted in assignment of majority of DEGs as uncharacterized or  
109 hypothetical proteins with undefined function [32]. In this study, DEGs ranging from 3 to 12  
110 and -3 to -12 (range selected randomly) were reannotated using NCBI database which led to  
111 the assignment of most of the DEGs with defined function which were left uncharacterized in  
112 previous study [32]. Further, after reannotation, based on literature survey, DEGs were selected  
113 for their role in pests and pathogenesis defense response or seed development.

#### 114 **Validation of RNA Seq by Quantitative Reverse Transcription Polymerase Chain** 115 **Reaction (qRT-PCR)**

116 Total RNA was extracted from immature seeds of Trombay wild and TU94-2 plants with the  
117 help of Spectrum Plant Total RNA Kit (Sigma-Aldrich, USA) and treated with DNase-I  
118 (Sigma-Aldrich, USA) to eliminate traces of genomic DNA. The cDNA first strand synthesis  
119 was done using a PrimeScript RT-PCR Kit (Clontech, USA) and quantitative real time PCR  
120 was performed following manufacturer's instructions given in SYBR1 Premix ExTaq  
121 (TliRNAse H Plus) (Clontech,USA). The PCR amplification was carried out in Rotor-Gene-Q  
122 Real-Time PCR System (Qiagen, USA) with the following program, 95°C for 5 min followed  
123 by 35 cycles of 94°C for 30 sec, 62°C for 20 sec and 72°C for 20 sec followed by melting of  
124 PCR products from 65°C to 95°C. Quantitative real-time PCR experiments for all gene-specific

125 primers were performed twice with three biological replicates run in triplicate. The relative  
126 gene expression levels were calculated by relative quantification (RQ) through the 2-  
127  $\Delta\Delta C_t$  method [33].

## 128 **Results**

### 129 **Transcriptome sequencing, assembly, annotation, DEGs prediction and reannotation**

130 Results of sequencing, assembly, submission of Seq data, annotation and DEGs prediction for  
131 TU94-2 and TW developing seeds transcriptomes were reported by the same authors in  
132 previous publications[14,32]. DEGs that lacks annotation in previous study (Green plant  
133 database) were reannotated with reference to NCBI nr database in this study and assigned with  
134 functions (S1Table). A total of 682 DEGs were reannotated including 264 up-regulated (3 to  
135 12 fold change) and 418 down-regulated (-3 to -12 foldchange). Heat map showed the  
136 differential expression pattern of top 100 DEGs in Fig. 1.

137

### 138 **Transcriptome characterization of wild blackgram (Trombay wild)**

139 The transcriptome analysis showed up-regulation of genes associated with pathogen/elicitors  
140 perception, downstream signalling and effectors. DEGs related to bruchid pest resistance that  
141 were found up-regulated in TW developing seeds are described in Table 1 and DEGs involved  
142 in defense responses to other phytopathogens are given in S2 Table.

143 The transcripts of three LRR-RLKs (leucine-rich repeat receptor-like protein kinase); Leucine-  
144 rich repeat receptor-like protein kinase At1g68400, LRR receptor kinase *BAK1* or somatic  
145 embryogenesis receptor kinase 1-like(*SERK*) and one each of LRR receptor-like  
146 serine/threonine-protein kinase *ERECTA*, RPK; receptor serine/threonine-protein kinase-like  
147 protein At1g28390, L-type lectin-domain containing receptor kinase S and transmembrane  
148 protein 87B were over-expressed. Four genes related to signal transduction were found up-  
149 regulated, of which 2 were serine/threonine-protein kinases: Serine/threonine-protein kinase  
150 *STY8* isoform C, probable serine/threonine-protein kinase At4g35230 and 2 were calcium  
151 related proteins: Calmodulin-like protein 1(*CML1*) and calnexin homolog isoform X1. Genes  
152 encoding several ribosomal proteins, translation initiation factors, carbohydrate metabolism  
153 genes, tubulin chains and myosin binding proteins, cell wall proteins such as  
154 glycosyltransferases, arabinogalactans and expansins were highly expressed. Stress-associated  
155 genes such as heat shock proteins, stress response proteins, DnaJ homologs, chaperons and

156 defense-associated genes such as acid phosphatase(*ACP*), 7S globulins, vicilins, thaumatin,  
157 miraculin and thioredoxin which are reported effectors against pathogens and pests were up-  
158 regulated. Transcripts of abscisic acid receptor(*PYL9*), protein phosphatase 2C (*PP2C*) and  
159 abscisic acid insensitive 5 (*ABI5*) were enriched. Interestingly gene encoding  
160 hydroperoxidelyase (*HPL*, *CYP74B*) which is a cytochrome P450 present in chloroplasts was  
161 found to be upregulated. Several transcriptional regulators belonging to different families were  
162 found up-regulated, which included ethylene-responsive transcription factor *ERF061*, zinc  
163 finger A20 and AN1 domain-containing stress-associated protein 5, transcription factor *LHW*,  
164 transcription termination factor *MTEF18*, RING-H2 finger protein *ATL8* and DNA-directed  
165 RNA polymerase III subunit *RPC7*. Several DEGs involved in growth, development,  
166 carbohydrate and amino-acid metabolism were found up-regulated. DEGs related to seed  
167 development included *GID1* receptor, *DELLA* proteins and Caffeic acid 3-O-methyltransferase  
168 were found up-regulated.

#### 169 **Transcriptome characterization of cultivated blackgram(TU94-2)**

170 Differentially expressed genes involved in defense responses to geminivirus and found up-  
171 regulated in TU94-2 developing seeds are described in Table 1 and DEGs involved in defense  
172 responses to other phytopathogens are given in S3 Table. Transcriptome analysis showed basal  
173 level up-regulation of genes encoding pathogen recognition receptors (PRRs) and LRR-  
174 containing proteins such as LRR receptor-like serine/threonine-protein kinase *RKF3*, receptor-  
175 like protein kinase *FERONIA*, LRR containing protein DDB\_G0290503, two F-box/LRR-  
176 repeat proteins (protein At4g29420 and protein 4) and four uncharacterized transmembrane  
177 proteins (transmembrane protein 205, transmembrane 9 superfamily member 2, transmembrane  
178 protein 230 and transmembrane protein *PM19L*) (S3 Table). The transcripts of upstream  
179 regulator of TOR, 1-phosphatidylinositol-3-phosphate 5-kinase *FAB1B*, several downstream  
180 effectors of TOR including abscisic acid receptor *PYL12*, protein phosphatase 2C (*PP2C*),  
181 three autophagy related proteins (*ATG 3,5* and *8C*) and several serine/threonine protease  
182 kinases, which constitutes TOR signaling such as Serine/threonine-protein kinase  
183 *AtPK2/AtPK19*, *ATG1t*, *CTR1*, *PBL11*, *PAKD* and *HT1* were upregulated. Interestingly gene  
184 encoding chloroplast located lipoxygenase (*LOX*) which is involved in biosynthesis of  
185 jasmonic acid was up-regulated. Noteworthy transcripts encoding components of PTI and ETI  
186 signaling including calcium-dependent protein kinase 28 (*CPK28*), mitogen-activated protein  
187 kinase kinase 5, mitogen-activated protein kinase kinase kinase *NPK1*, tobamovirus  
188 multiplication protein 1 (*TOM1*) were found to be over-expressed. A number of transcription



189 factors associated with pathogenesis were also found upregulated which belonged to families  
190 such as *MYB*, *NAC* and *WD*-repeat domains containing transcription factors. Several transcripts  
191 of *DNAJ*, heat shock chaperones, ubiquitin activating, conjugating enzymes, ligases, SEC  
192 interacting proteins and proteasomes were observed to be highly expressed. In addition,  
193 another susceptibility factor found to be enriched in TU94-2 cultivar was DOWNY MILDEW  
194 RESISTANCE 6(*DMR6*). Similar to TW, DEGs involved in growth, development and  
195 metabolism were also found up-regulated in TU94-2 developing seeds. Apart from this DEGs  
196 related to cell expansion, cell wall loosening and protein turnover (*MYB1R1* DNA-binding  
197 protein, xyloglucan endotransglucosylase, Ubiquitin proteasome system components and  
198 rhamnogalacturonan I rhamnosyltransferase 1) which directly or indirectly regulates seed  
199 development were also found up-regulated in TU94-2.

## 200 **Validation of differentially expressed genes using quantitative real-time PCR**

201 We quantified relative expression of total 27 genes, 22 DEGs from the RNA-seq dataset of  
202 blackgram developing seeds and 5 genes coding for putative factors reported for imparting  
203 resistance to pests were based on literature survey. The elongation factor EF 1 $\alpha$  gene was used  
204 as an internal control for normalisation. Details of primers used in this study are given in Table  
205 2. The relative gene expression patterns of the qRT-PCR results for 22 genes were consistent  
206 with RNA-Seq data. Out of 22 genes, 15 up-regulated and 7 down-regulated genes in TW were  
207 validated by qRT-PCR (Fig. 2(a,b)). TW transcript coding for an acid phosphatase protein  
208 (Purple acid phosphatase *ACPI8*) had higher (1.3 fold) expression levels compared to TU-94-2  
209 cultivar (Fig. 3a). The transcript of universal stress protein *PHOS32* showed 2.5 fold more  
210 expression in wild than cultivar under controlled conditions (Fig. 3b). We also validated a  
211 leucine-rich repeat receptor like kinase gene (*LRR-RLK*) which showed enhanced expression  
212 (1.4 fold change) in wild in comparison to cultivar. Similar fold changes were also observed in  
213 TW as compared to TU94-2 cultivar for the following under controlled conditions, which  
214 included golgin subfamily A member 6-like protein 6, multiple organellar RNA editing factor  
215 2, RING-H2 finger protein ATL8-like, ANTAGONIST OF LIKE HETEROCHROMATIN  
216 PROTEIN 1, protein RETICULATA-RELATED 1 (chloroplastic), EID1-like F-box protein 2,  
217 prostatic spermine-binding protein, protein *PNSI*, glycosyltransferase *BC10*, gibberellin  
218 receptor *GIDI*, geranylgeranyl pyrophosphate synthase 7 (chloroplastic) and 50S ribosomal  
219 protein 5 (chloroplastic) (Fig. 3a and 3b).

## 220 **Comparative analysis of TW and TU94-2 transcriptomes with respect to bruchid,** 221 **geminiviruses resistance and seed development**

222 In TW seed transcriptome, 11 up-regulated transcripts encode for cellular factors related to  
223 resistance against bruchid pests and 5 up-regulated transcripts encode for geminiviruses  
224 resistance related factors. Among these, 3 transcripts (LRR receptor kinase, transmembrane  
225 protein 87b and thaumatin like protein) were found to be common which are involved in  
226 resistance to both pests and geminiviruses (Fig. 4 and S4Table). Similarly, TU94-2 seed  
227 transcriptome showed 15 up-regulated transcripts related to geminiviruses resistance, 9  
228 transcripts for pests resistance and 5 transcripts (LRR receptor-like serine/threonine-protein  
229 kinase *RKF3*, leucine-rich repeat-containing protein *DDB\_G0290503*, seed linoleate 9S-  
230 lipooxygenase-3, cysteine protease and cysteine protease *RD19D*) as common for both agents  
231 (Fig. 4 and S4Table). While for seed development, majority of DEGs related to growth and  
232 metabolism showed similar pattern of expression. But few DEGs showed considerable  
233 difference in the expression level which may be responsible for genotypic specific traits. In  
234 TW transcriptome 12 transcripts were found to be up-regulated, which are related to protein  
235 synthesis and ubiquitin proteasome machinery and one each for less common genes such as  
236 caffeic acid 3-O-methyltransferase, vegetative cell wall protein gp1-like and *DELLA* protein  
237 *GAI* (S5Table). Whereas, in TU94-2 transcriptome, 24 up-regulated transcripts code for protein  
238 synthesis and ubiquitin proteasome machinery components and one each for  
239 rhamnogalacturonan I rhamnosyltransferase 1-like, xyloglucan endotransglucosylase/hydrolase  
240 2, cellulose synthase, galactinol synthase, two for galactosyltransferase and four transcripts for  
241 late embryogenesis abundant protein (S5Table).

242

## 243 **Discussion**

244 In this study, we compared the transcriptomes of developing seeds of wild and cultivated  
245 blackgram differing in phenotypes for 3 traits, to identify the resistance mechanism and  
246 candidate genes expressing constitutively at basal level.

## 247 **Transcriptome characterization of wild blackgram: Innate immune system in response to** 248 **bruchid pests and other phytopathogens**



249 Timely perception of pathogens and effective defense response by plant host depends on  
250 plasmamembrane localized receptors for elicitor recognition and downstream signaling[34].  
251 In TW, transmembrane receptors *BAK1*, *SERK1*, *ERECTA* and lectin domain receptors were  
252 found up-regulated, which are regulators of PAMP triggered immunity. For example, *BAK1* is  
253 required for immunity to diverse RNA viruses [35-37]. Recently, lectin receptor kinase and  
254 chitinase were found to be associated with bruchid resistance trait in wild blackgram accession  
255 TC2210 through high-density linkage map [1]. Up-regulation of receptor serine/threonine  
256 kinase (*RSTK*) in the oviposited developing seeds of moderately tolerant blackgram is  
257 speculated to be required for perception of elicitors (bruchins) [17]. Serine/threonine-protein  
258 kinase At4g35230/ BR-signaling kinase 1 (*BSK1*)was also up-regulated which mediates signal  
259 transduction from receptor kinase *BRI1*and positively regulates brassinosteroid signaling and  
260 plant immunity [38]. Therefore, above up-regulated receptor kinases might be important for  
261 resistance to bruchids and pathogens in wild blackgram. The most represented transcription  
262 factorsin the DEGs included Ethylene response factors (ERFs), followed by the Tri-helix  
263 transcription factors. ERFs are regulators of pathogenesis-related genes and ethylene-, salicylic  
264 acid-, and jasmonic acid-inducible genes [39]. The bHLH transcription factor was also up-  
265 regulated which imparted immunity to viruses such as tomato *yellow leaf curl virus*[40] and in  
266 cotton leaf curl disease (CLCuD) stress [41]. Hydroperoxidelyase transcript (*HPL*, *CYP74B*)  
267 was found up-regulated which is involved in biosynthesis of jasmonic acid and green leaf  
268 volatiles that are deterrents to insects/pests [42]. RNA-Seq results showed basal level over-  
269 expression of anti-insect and anti-pathogenic compounds such as acid phosphatase, thaumatin  
270 like proteins, trypsin inhibitor/miraculin, vicilin and 7s globulin. Thaumatin-like proteins are  
271 the pathogenesis-related (PR) protein family 5 (PR5) proteins which are known to get induced  
272 by pathogen/pest attack [43]. Proteinase inhibitors (PIs) are natural defense proteins generally  
273 present in seeds which gets induced by herbivory or wounding [44] and imparts a cumulative  
274 protective effect on plants due to their anti-nature for insects, nematodes, viruses, bacteria and  
275 fungi pathogens [45-47]. Trypsin is known to be involved in developmental processes of  
276 insects such as molting and synthesis of neuropeptides, therefore trypsin inhibitors can affect  
277 these critical stages, which lead to growth and developmental retardation of the larvae [48].  
278 Likewise numerous studies have reported detrimental effects of legume vicilins and 7S  
279 globulins on insects development especially for *C. maculatus* [49,50]. Besides being involved  
280 in phosphate acquisition and utilization [51], acid phosphatases have been also implicated in  
281 resistance to herbivore insects (*Egyptian cotton worm*)[52,53], bruchids (*Callosobruchus*  
282 *maculatus*)[54], pathogens and nematodes [55,56]. Above RNA-Seq results suggests that in

283 wild blackgram developing seeds, up-regulated cellular components primarily functions in seed  
284 development and secondarily involved in defense processes. Moreover, different regulation of  
285 processes might be responsible for differential expression of defense effectors in TW, thus  
286 imparting it enhanced tolerance to specific pests/pathogens and different from cultivated  
287 blackgram. Pictorial view of hypothesized pathway and processes operating in TW developing  
288 seeds that may be controlling resistance against pests and pathogens is given in S1Fig.

289

### 290 **Transcriptome characterization of TU94-2 cultivated blackgram: Defense system in** 291 **response to viruses and other phytopathogens**

292 Similar to TW, TU94-2 transcriptome showed up-regulation of defense related genes different  
293 from TW. RNA-Seq showed up-regulation of FERONIA (*FER*) that serves as a receptor for a  
294 unique peptide ligand, RALF1 (Rapid Alkalinization Factor 1) and play role in effector-  
295 triggered immunity (ETI) through the RALF1–FER–RIPK signalling module that may intersect  
296 with the RIPK–RIN4 (RPM1-induced protein kinase - RPM1-interacting protein 4) pathway  
297 [57,58]. Several uncharacterized RLKs and LRR containing proteins were found up-regulated  
298 in TU94-2 developing seeds that may be candidate R genes and may be involved in the  
299 perception of geminiviruses and other pathogens. For example, it was shown that C4 protein of  
300 TYLCV, BCTV and NSP protein of *cabbage leaf curl virus* interacts with BARELY ANY  
301 MERISTEM (BAM) and with LRR receptor like kinase [59-61]. Mitogen-activated protein  
302 kinase kinase 5 is a component of MAP kinase signalling cascade (MEKK1, MKK4/MKK5  
303 and MPK3/MPK6) which gets activated by bacterial flagellin receptor FLS2 and stimulate  
304 hydrogen peroxide generation during hypersensitive response-like cell death [62,63]. Transcript  
305 of mitogen-activated protein kinase kinase kinase *NPK1* was found over-expressed, which plays  
306 a role in the NACK-PQR (NPK1-NQK1/MEK1-NRK1) MAP kinase signaling pathway and  
307 controls resistance gene-mediated responses such as the N-mediated resistance to tobamovirus  
308 (TMV) and the Rx-mediated hypersensitive response (HR) to *potato virus X* (PVX)[64]. Plants  
309 employ both RNA silencing and autophagy as antiviral defense strategies during geminivirus  
310 infection for silencing of viral transcripts and degradation of viral virulence factors respectively  
311 [65,66]. The TU94-2 transcriptome showed up-regulation of transcripts for three autophagy  
312 related proteins *ATG 3,5* and *8C* and one serine/threonine-protein kinase *ATG1t* that may be  
313 involved in interaction with geminiviruses as observed for autophagy-related NbATG8f protein  
314 with the *cotton leaf curl multan virus* CLCuMuB-βC1 protein [67]. The RNA-Seq data showed  
315 enriched transcript of tobamovirus multiplication protein 1, which is a susceptibility factor and

316 necessary for intracellular multiplication of tobamovirus [68] but it's over expression leads to  
317 increased accumulation of the membrane-bound forms and decreased accumulation of the  
318 soluble forms thus inhibiting tobamovirus multiplication [69]. The family of TFs with the most  
319 members represented in DEGs included ERFs, followed by the zinc finger CCCH containing  
320 protein, *MYB*, *WRKY*, *NAC* and *WD*-repeat families, which regulates several jasmonate and  
321 ethylene responsive defense genes under pathogen attack [70] as reported in *G. arboreum*  
322 defense against CLCuD [41]. Transcript for *ERF9* was up-regulated. *ERF9* binds to the GCC-box  
323 pathogenesis-related promoter element under stress [71] and negatively regulates defense  
324 against necrotrophic fungi [72]. Gene encoding *TIFY10A* was over-expressed, which is a  
325 repressor of jasmonate responses and gets induced by wounding, jasmonate and herbivory  
326 [73,74]. Geminivirus infection also induces the expression of a DNA-binding protein TIFY4B  
327 that acts as a geminiviral resistance factor. The interaction of CabLCV and TGMV TrAPs with  
328 TIFY4B inhibits its potential role in cell cycle arrest [75]. Transcripts for  $\beta$ -1,3-glucanase,  
329 DnaJ, heat shock chaperones and callose synthase were up-regulated, which might hinder cell  
330 to cell movement of viral particles as observed for  $\beta$ -1,3-glucanase interaction with TGB2  
331 protein of Potato Virus X (PVX) [76] and transportation and replication of geminiviruses as  
332 observed for DnaJ (HSP 40) [77,78]. In TU94-2 several transcripts components for ubiquitin  
333 proteasome system (UPS) were found up-regulated, that are known to target the virus proteins  
334 for degradation as defense strategy [79]. For example, SUMO-conjugating enzyme 1 (SCE1)  
335 interaction with geminiviral Rep protein [80] and ubiquitin-conjugating (UBC)  
336 enzyme (SIUBC3) interaction with *Cotton leaf curl Multan virus* (CLCuMV)  $\beta$ C1 protein [81].  
337 This suggests that ubiquitin mediated proteolysis could be a defense strategy against symptom  
338 development. Gene encoding lipoxygenase (*LOX*) was found to be up-regulated that is known  
339 to be involved in jasmonic acid (JA) synthesis and is also induced by wounding, herbivory and  
340 pathogen invasion. This leads to induction of genes encoding proteinase inhibitors, flavonoid  
341 biosynthesis (chalcone synthase and phenylalanine ammonia lyase), sesquiterpenoid  
342 biosynthesis (hydroxymethylglutaryl CoA reductase), thionin (antifungal protein), and osmotin  
343 (antifungal protein). Interestingly, another gene coding for immunity suppressor found up-  
344 regulated was DOWNY MILDEW RESISTANCE 6 encoding a salicylate-5hydroxylase that  
345 converts salicylic acid (SA) to 2,3-dihydroxybenzoic acid (2,3-DHBA) [82]. It negatively  
346 regulates defense related genes (e.g. *PR-1*, *PR-2*, and *PR-5*) and is required for susceptibility to  
347 the downy mildew pathogen *Hyaloperonospora arabidopsidis*, *Pseudomonas syringae* pv.  
348 tomato DC3000 and oomycete *Phytophthora capsica* [83]. Likewise, in comparison to TW,  
349 different regulatory processes may be responsible for differential expression of defense

350 effectors in TU94-2, thus, imparting it enhanced tolerance to diverse range of pathogens and  
351 different from wild blackgram. Pictorial view of a hypothesized pathway and processes  
352 operating in TU94-2 developing seeds that may be controlling resistance against geminiviruses  
353 and pathogens is given in S2Fig.

354

### 355 **Seed Development**

356 In this study, RNA-Seq results revealed differential expression of genes related to cell wall  
357 modification, carbohydrate metabolism, and hormone signalling, which were also reported in  
358 seed development studies in legumes [84-86]. In TU94-2 developing seeds, genes controlling  
359 seed size/weight, seed coat texture etc., were found to be upregulated which included MYB1R1  
360 DNA-binding protein (*R2R3 MYB*, *MYB56* and a *MYB*-like DNA-binding protein [20, 87]),  
361 xyloglucan endotransglucosylase [20, 88], Ubiquitin proteasome system components [20, 80  
362 89] and rhamnogalacturonan I rhamnosyltransferase 1[81 90]. While, in small sized TW seeds,  
363 genes found upregulated and observed in seed development included *GIDI* receptor, *DELLA*  
364 proteins and Caffeic acid 3-O-methyltransferase. *DELLA* is an inhibitor of plant growth which  
365 gets degraded on application of GA3 hormone on dormant seeds, thereby promoting plant  
366 germination [91]. Caffeoyl alcohols derived lignins were found in the seed coat of castor bean  
367 [92] and early expression of lignin related genes in small-seeded castor bean seed coat leads to  
368 early lignin deposition thus restricting seed size due to suppressed cell division by rigid  
369 secondary cell walls [93]. Seed development studies revealed that seed coats posed physical  
370 constraints on embryo and/or endosperm growth by setting an upper limit for seed size [94,95].  
371 Abscisic acid insensitive 5 (*ABI5*) was found to be upregulated in TW developing seeds which  
372 negatively regulates seed germination in *Arabidopsis*[96] through mediating cell responses to  
373 ABA in seeds and vegetative tissues.

374

### 375 **Comparative analysis of TW and TU94-2 transcriptome with respect to pests,** 376 **geminiviruses and seed development**

377 In TW developing seeds, up-regulated transcripts coding for bruchidpest resistance related  
378 factors are predominant compared to geminiviruses interaction related factors. In contrast in  
379 TU94-2 seeds, up-regulated transcripts related to geminiviruses interaction constitute majorly  
380 compared to bruchidpest resistance related factors. Lectin domain containing protein, acid  
381 phosphatase, vicilin, thaumatin, miraculin/trypsin inhibitor transcripts found up-regulated in

382 TW are known for bruchid pest resistance as discussed earlier, while cysteine protease,  
383 endochitinase, wound-induced protein also related to pests resistance were found up-regulated  
384 in TU94-2 developing seeds. This suggests that bruchid resistance trait of TW could be due to  
385 Lectin domain containing protein, acid phosphatase, vicilin, thaumatin, miraculin/trypsin  
386 inhibitor. Both TW and TU94-2 developing seeds showed presence of several forms of DnaJ  
387 protein which is known to play a role in geminivirus multiplication and movement, thus  
388 suggesting the less significance of DnaJ proteins for geminivirus resistance in TU94-  
389 2. Transcripts coding for LRR repeat proteins and autophagy related proteins, which play a role  
390 in interaction with geminiviruses were found to be up-regulated in TU94-2, suggesting their  
391 significance in imparting YMD resistance trait to TU94-2. In TU94-2 developing seeds,  
392 transcripts related to protein biogenesis, turnover and ubiquitin proteasome system were more  
393 prominent compared to TW, thus suggesting more metabolically active state in TU94-2.  
394 Moreover, up-regulation of several distinct transcripts related to cell wall modification and  
395 texture in TU94-2 developing seeds suggests difference in seed coat texture of both blackgram  
396 genotypes.

397 In conclusion, this is the first report that describes the differences in transcriptomes between  
398 wild and cultivated blackgram differing in three important traits. Our analysis defined putative  
399 resistance mechanism and candidate genes under constitutive expression in blackgram that are  
400 related to defense responses to diverse pests and pathogens. This study lays a theoretical  
401 foundation for an improved understanding of the molecular mechanisms involved in resistance  
402 to bruchid pest, geminiviruses and other pathogens and mechanisms regulating seed  
403 development.

404

#### 405 **Acknowledgments**

#### 406 **Author information**

#### 407 **Affiliations**

408 Nuclear Agriculture and Biotechnology Division, Bhabha Atomic Research Centre, Trombay,  
409 Mumbai-400085, India

410 Avi Raizada & Souframanien Jegadeesan

411 Homi Bhabha National Institute, Training School Complex, Anushaktinagar, Mumbai-400094,  
412 India

413 Avi Raizada, & Souframanien Jegadeesan

414

415 **Authors' contributions**

416 AR carried out the experiment and wrote the manuscript with support from JS. JS conceived  
417 the idea and supervised the project. Both authors have read and approved the manuscript.

418

419 **Corresponding author**

420 Correspondence to [souf@barc.gov.in](mailto:souf@barc.gov.in)

421

422 **Competing interests**

423 The authors declare that they have no competing interests.

424 **Funding**

425 This work was carried out in the Bhabha Atomic Research Centre and not supported by any  
426 other external funding agency. The funder has no role in the design of the study and collection,  
427 analysis, and interpretation of data and in writing the manuscript.

428

429 **References**

- 430 1. Somta P, Chen J, Yundaeng C, Yuan X, Yimram T, Tomooka N et al. Development of  
431 an SNP-based high-density linkage map and QTL analysis for bruchid (*Callosobruchus*  
432 *maculatus* F.) resistance in black gram (*Vigna mungo* (L.) Hepper). Scientific  
433 reports.2019;9:3930.
- 434 2. Varma A, Malathi VG. Emerging geminivirus problems: A serious threat to crop  
435 production. Ann. Appl. Biol.2003;142: 145–164.
- 436 3. Srinivasan T, Duraimurugan P, Singh SK, Chattopadhyay C. Bruchids infestation in  
437 pulses and its management. Indian Farming.2010; 60:13-16.
- 438 4. Souframani J, Gopalakrishna T. ISSR and SCAR markers linked to the *mungbean*  
439 *yellow mosaic virus* (MYMV) resistance gene in blackgram [*Vigna mungo* (L.)  
440 Hepper]. Plant Breeding. 2006;125: 619-622.
- 441 5. Souframani J, Gupta SK, Gopalakrishna Y. Identification of quantitative trait loci for  
442 bruchid (*Callosobruchus maculatus*) resistance in black gram [*Vigna mungo* (L.)  
443 Hepper]. Euphytica. 2010;176: 349–356.
- 444 6. Duraimurugan P, Pratap A, Singh SK, Gupta S. Evaluation of Screening Methods for  
445 Bruchid Beetle (*Callosobruchus chinensis*) resistance in Greengram (*Vignar adiata*)  
446 and Blackgram(*Vigna mungo*) genotypes and influence of seed physical characteristics  
447 on its infestation. International journal of plant research.2014;27: 60-67.
- 448 7. Soundararajan R, Geetha S, Chitra N, Dinakaran D. Resistance in *Vigna mungo* var.  
449 *silvestris* against Bruchids, *Callosobruchus maculatus*(F.). Ann Pl. Protec. Sci.2013;  
450 21: 279-282.
- 451 8. Dongre TK, Pawar SE, Thakare RG, Harwalkar MR. Identification of resistant sources  
452 to cowpea weevil (*Callosobruchus maculatus* (F.)) in *Vigna* sp. and inheritance of their  
453 resistance in black gram (*Vigna mungo* var. *mungo*). Journal of Stored Products  
454 Research.1996;32: 201-4.
- 455 9. Souframani J, Gopalakrishna T. Source for bruchid resistance and its inheritance in  
456 Trombay wild urd bean (*Vigna mungo* var. *silvestris*). Journal of Food  
457 Legumes.2007;20: 19–21.
- 458 10. Chaitieng B, Kaga A, Tomooka N, Isemura T, Kuroda Y, Vaughan DA. Development  
459 of a black gram [*Vigna mungo* (L.) Hepper] linkage map and its comparison with an



- 460 azuki bean [*Vigna angularis* (Willd.) Ohwi and Ohashi] linkage map. Theor Appl  
461 Genet. 2006;113: 1261–1269.
- 462 11. Gupta SK, Souframanien J, Gopalakrishna T. Construction of a genetic linkage map of  
463 black gram, *Vigna mungo* (L.) Hepper, based on molecular markers and comparative  
464 studies. Genome. 2008;51: 628–637.
- 465 12. Gupta S, Gupta DS, Anjum TK, Pratap A, J Kumar. Inheritance and molecular tagging  
466 of MYMIV resistance gene in blackgram (*Vigna mungo* L. Hepper). Euphytica.  
467 2013; 193: 27–37.
- 468 13. Souframanien J, Gopalakrishna T. A comparative analysis of genetic diversity in  
469 blackgram genotypes using RAPD and ISSR markers. Theor Appl Genet. 2004;109:  
470 1687-1693.
- 471 14. Souframanien J, Reddy KS. *De novo* assembly, characterization of immature seed  
472 transcriptome and development of genic-SSR markers in black gram [*Vigna*  
473 *mungo*(L.) Hepper]. PLoS One. 2015; 10: e0128748.
- 474 15. Kundu A, Patel A, Paul S, Pal A. Transcript Dynamics at Early Stages of Molecular  
475 Interactions of MYMIV with Resistant and Susceptible Genotypes of the Leguminous  
476 Host, *Vigna mungo*. PLoS ONE. 2015;10: e0124687.
- 477 16. Kundu A, Singh PK, Dey A, Ganguli S, Pal A. Complex molecular mechanisms  
478 underlying MYMIV-resistance in *Vigna mungo* revealed by comparative transcriptome  
479 profiling. Sci Rep. 2019;9: 8858.
- 480 17. Baruah IK, Panda D, M.V J, Das DJ, Acharjee S, Sen P, et al. Bruchid egg induced  
481 transcript dynamics in developing seeds of black gram (*Vigna mungo*). PLoS ONE.  
482 2017;12: e0176337.
- 483 18. Chakraborty N, Basak J. Comparative transcriptome profiling of a resistant vs.  
484 susceptible *Vigna mungo* cultivar in response to *Mungbean yellow mosaic India virus*  
485 infection reveals new insight into MYMIV resistance. Current Plant Biology.  
486 2018;15: 8-24.
- 487 19. Ganguli S, Dey A, Banik R, Kundu A, Pal A. Analyses of MYMIV-induced  
488 transcriptome in *Vigna mungo* as revealed by next generation sequencing. Genomics  
489 Data. 2016;7: 226–228.
- 490 20. Du J, Wang S, He C, Zhou B, Ruan Y, Shou H. Identification of regulatory networks  
491 and hub genes controlling soybean seed set and size using RNA sequencing analysis. J  
492 Exp Bot. 2017;68: 1955-1972.
- 493 21. Butsayawarapat P, Juntawong P, Khamsuk O, Somta P. Comparative Transcriptome  
494 Analysis of Waterlogging-Sensitive and Tolerant Zombi Pea (*Vigna vexillata*) Reveals  
495 Energy Conservation and Root Plasticity Controlling Waterlogging Tolerance. Plants.  
496 2019; 8: 264.
- 497 22. Thomas J, Bowman MJ, Vega A, Kim HR, Mukherjee A. Comparative transcriptome  
498 analysis provides key insights into gene expression pattern during the formation of  
499 nodule-like structures in *Brachypodium*. FunctIntegr Genomics. 2018;18: 315-326.
- 500 23. Doss RP, Oliver JE, Proebsting WM, Potter SW, Kuy S, Clement SL, et al. Bruchins:  
501 Insect-derived plant regulators that stimulate neoplasm formation. Proceedings of the  
502 National Academy of Sciences of the United States of America. 1997; 97: 6218-6223.
- 503 24. Hilker M, Fatouros NE. Plant responses to insect egg deposition. Annual Review of  
504 Entomology. 2015;60: 493-515.
- 505 25. Pare PW, Tumlinson JH. Plant volatiles as a defense against insect herbivores. Plant  
506 Physiology. 1999;121: 325-331.

- 507 26. Mithofer A, Boland W. Recognition of Herbivory associated molecular patterns. *Plant*  
508 *Physiology*. 2008;146: 825-831.
- 509 27. Herms DA, Mattson WJ. The dilemma of plants: to grow or defend. *Q. Rev. Biol.*  
510 1992;67: 283–335.
- 511 28. Huot B, Yao J, Montgomery BL, He SY. Growth–defense trade-offs in plants: A  
512 balancing act to optimize fitness. *Mol. Plant*.2014;7: 1267–1287.
- 513 29. Belkhadiri Y, Yang L, Hetzel J, Dangl JL, Chory J. The growth-defense pivot: crisis  
514 management in plants mediated by LRR-RK surface receptors. *Trends in Biochemical*  
515 *Sciences*. 2014;39: 447– 456.
- 516 30. Campos ML, Campos ML, Yoshida Y, Major IT, Ferreira DDO, Weraduwege SM. et  
517 al. Rewiring of jasmonate and phytochrome B signalling uncouples plant growth-  
518 defense tradeoffs. *Nature Communications*. 2016;7: 12570.
- 519 31. Reitz MU, Gifford ML, Schafer P. Hormone activities and the cell cycle machinery in  
520 immunity triggered growth inhibition. *Journal of Experimental Botany*. 2015;66: 2187–  
521 2197.
- 522 32. Raizada A, Souframanien J. Transcriptome sequencing, de novo assembly,  
523 characterisation of wild accession of blackgram (*Vigna mungo* var. *silvestris*) as a rich  
524 resource for development of molecular markers and validation of SNPs by high  
525 resolution melting (HRM) analysis. *BMC Plant Biol*. 2019; 19: 358.
- 526 33. Livak KJ, Schmittgen TD. Analysis of relative gene expression data using real-time  
527 quantitative PCR and the  $2^{-\Delta\Delta CT}$  Method. *Methods*. 2001; 25: 402–408.
- 528 34. Morillo SA, Tax FE. Functional analysis of receptor-like kinases in monocots and  
529 dicots. *Current Opinion in Plant Biology*. 2006;9: 460-469.
- 530 35. Nicaise V, Candresse T. Plum pox virus capsid protein suppresses plant pathogen-  
531 associated molecular pattern (PAMP)-triggered immunity. *Mol. Plant Pathol*. 2017;18:  
532 878–886.
- 533 36. Niehl A, Wyrsh I, Boller T, Heinlein M. Double-stranded RNAs induce a  
534 pattern-triggered immune signaling pathway in plants. *New Phytol*. 2016;211: 1008–  
535 1019.
- 536 37. Korner CJ, Klauser D, Niehl A, Domínguez-Ferreras A, Chinchilla D, Boller T. et al.  
537 The immunity regulator BAK1 contributes to resistance against diverse RNA  
538 viruses. *Mol. Plant Microbe Interact*. 2013;26: 1271–1280.
- 539 38. Tang W, Kim TW, Oses-Prieto JA, Sun Y, Deng Z, Zhu S. et al. BSKs mediate signal  
540 transduction from the receptor kinase BRI1 in *Arabidopsis*. *Science*. 2008;321: 557-  
541 560.
- 542 39. Gutterson N, Reuber TL. Regulation of disease resistance pathways by AP2/ERF  
543 transcription factors. *Curr Opin Plant Biol*.2004;7: 465–471.
- 544 40. Wang J, Hu Z, Zhao T, Yang Y, Chen T, Yang M. et al. Genome-wide analysis of  
545 bHLH transcription factor and involvement in the infection by *yellow leaf curl virus* in  
546 tomato (*Solanum lycopersicum*). *BMC genomics*. 2015;16: 39.
- 547 41. Naqvi RZ, Zaidi SS, Akhtar KP, Strickler S, Woldemariam M, Mishra B. et al.  
548 Transcriptomics reveals multiple resistance mechanisms against cotton leaf curl disease  
549 in a naturally immune cotton species, *Gossypium arboreum*. *Sci Rep*. 2017;7: 15880.
- 550 42. Rustgi S, Springer A, Kang C, Wettstein DV, Reinbothe C, Reinbothe S. et al.  
551 ALLENE OXIDE SYNTHASE and HYDROPEROXIDE LYASE, Two Non-  
552 Canonical Cytochrome P450s in *Arabidopsis thaliana* and Their Different Roles in  
553 Plant Defense. *Int. J. Mol. Sci*. 2019; 20: 3064.

- 554 43. Van Loon LC, Rep M, Pieterse CM. Significance of inducible defense-related proteins  
555 in infected plants. *Annu Rev Phytopathol.* 2006;44: 135–162.
- 556 44. Ryan CA. Protease inhibitors in plants: Genes for improving defenses against insects  
557 and pathogens. *Ann. Rev. Phytopathol.* 1990;28: 425-449.
- 558 45. Joshi B, Sainani M, Bastwade K, Gupta VS, Ranjekar PK. *Biochem. Biophys. Res.*  
559 *Commun.* 1998;246: 382–387.
- 560 46. Lorito M. et al. *Mol. Plant Microbe Interact.* 1994;7: 525–527.
- 561 47. Ryan CA, Bishop PD, Graham JS, Broadway RM, Duffey SS. *J. Chem. Ecol.* 1986;12:  
562 1025–1036.
- 563 48. Shukler RH, Murdock LL, Galloway RL. *Insect Biochem.* 1985; 15: 93–101.
- 564 49. Firmino F, Fernandes KVS, Sales MP, Gomes VM, Alcantara MRM, Domingues et al.  
565 Cowpea (*Vigna unguiculata*) vicilins associate with putative chitinous structures in  
566 midgut and feces of the bruchid beetles *Callosobruchus maculatus* and *Zabrotes*  
567 *subfasciatus*. *Braz J Med Biol Res.* 1996;29: 749–756.
- 568 50. Yunes ANA, Andrade MTD, Sales MP, Morais RA, Fernandes KVS, Gomes VM. et al.  
569 Legume seed vicilins (7S storage proteins) interfere with the development of the  
570 cowpea weevil [*Callosobruchus maculatus* (F.)]. *J Sci Food Agric.* 1998; 76: 111–116.
- 571 51. Duff SMG, Sarath G, Plaxton WC. The role of acid-phosphatases in plant phosphorus-  
572 metabolism. *Physiol Plant.* 1994;90: 791–800.
- 573 52. Berger S, Mitchell-Olds T, Stotz HU. Local and differential control of vegetative  
574 storage protein expression in response to herbivore damage in *Arabidopsis thaliana*.  
575 *Physiol Plant.* 2002;114: 85–91.
- 576 53. Stotz HU, Pittendrigh BR, Kroymann J, Weniger K, Fritsche J, Bauke A et al. Induced  
577 plant defense responses against chewing insects. Ethylene signaling reduces resistance  
578 of *Arabidopsis* against *Egyptian cotton worm* but not diamondback moth. *Plant*  
579 *Physiol.* 2000;124: 1007–1017.
- 580 54. Liu JZ, Blancaflor EB, Nelson RS. The *Tobacco mosaic virus* 126-kilodalton protein, a  
581 constituent of the virus replication complex, alone or within the complex aligns with  
582 and traffics along microfilaments. *Plant Physiol.* 2005; 138: 1853-1865.
- 583 55. Williamson VM, Colwell G. Acid phosphatase-1 from nematode resistant tomato—  
584 isolation and characterization of its gene. *Plant Physiol.* 1991;97: 139–146.
- 585 56. Jakobek JL, Lindgren PB. Expression of a bean acid phosphatase cDNA is correlated  
586 with disease resistance. *J Exp Bot.* 2002;53: 387–389.
- 587 57. Liu J, Elmore J, Lin D, Coaker G. A receptor like cytoplasmic protein kinase  
588 phosphorylates RIN4, triggering plant innate immunity. *Cell Host Microbe.* 2011;9:  
589 137–146.
- 590 58. Liao H, Tang R, Zhang X, Luan S, Yu F. FERONIA Receptor Kinase at the Crossroads  
591 of Hormone Signaling and Stress Responses. *Plant and Cell Physiology.* 2017;58:  
592 1143–1150.
- 593 59. Rosas-Diaz T, Zhang D, Fan P, Wang L, Ding X, Jiang Y. et al. A virus-targeted plant  
594 receptor-like kinase promotes cell-to-cell spread of RNAi. *PNAS.* 2018;115:1388–  
595 1393.
- 596 60. Piroux N, Saunders K, Page A, Stanley J. Geminivirus pathogenicity protein C4  
597 interacts with *Arabidopsis thaliana* shaggy-related protein kinase AtSKeta, a  
598 component of the brassinosteroid signaling pathway. *Virology.* 2007;362: 428–440.
- 599 61. Fontes EP, Santos AA, Luz DF, Waclawovsky AJ, Chory J. The geminivirus nuclear  
600 shuttle protein is a virulence factor that suppresses transmembrane receptor kinase  
601 activity. *Genes Dev.* 2004;18: 2545–2556.

- 602 62. Ren D, Yang H, Zhang S. Cell death mediated by MAPK is associated with hydrogen  
603 peroxide production in *Arabidopsis*. *J. Biol. Chem.* 2002;277:559-565.
- 604 63. Asai T, Tena G, Plotnikova J, Willmann MR, Chiu W-L, Gomez LG. et al. MAP kinase  
605 signalling cascade in *Arabidopsis* innate immunity. *Nature.* 2002; 415: 977-983.
- 606 64. Jin H, Axtell MJ, Dahlbeck D, Ekwenna O, Zhang S, Staskawicz B. et al. NPK1, an  
607 MEKK1-like mitogen-activated protein kinase kinase kinase, regulates innate immunity  
608 and development in plants. *Dev. Cell.* 2002;3: 291-297.
- 609 65. Rodríguez-Negrete EA, Carrillo-Tripp J, Rivera-Bustamante RF. RNA silencing  
610 against geminivirus: Complementary action of posttranscriptional gene silencing and  
611 transcriptional gene silencing in host recovery. *J. Virol.* 2009;83: 1332–1340.
- 612 66. Choi Y, Bowman JW, Jung JU. Autophagy during viral infection - a double-edged  
613 sword. *Nat. Rev. Microbiol.* 2018;16: 341–354.
- 614 67. Yakupjan H, Ismayil A, Jia Q, Wang Y, Zheng X, Chen T. et al. Autophagy functions  
615 as an antiviral mechanism against geminiviruses in plants. *eLife.* 6,e23897(2017).
- 616 68. Yamanaka T, Imai T, Satoh R, Kawashima A, Takahashi M, Tomita K. et al. Complete  
617 inhibition of tobamovirus multiplication by simultaneous mutations in two homologous  
618 host genes. *J. Virol.* 2002;76: 2491-2497.
- 619 69. Hagiwara-Komoda Y, Hirai K, Mochizuki A, Nishiguchi M, Meshi Tetsuo, Ishikawa  
620 M. Over expression of a host factor TOM1 inhibits *Tomato mosaic virus* propagation  
621 and suppression of RNA silencing. *Virology.* 2008;376: 132-139.
- 622 70. Huang PY, Catinot J, Zimmerli L. Ethylene response factors in *Arabidopsis* immunity.  
623 *Journal of experimental botany.* 2015;67:1231–1241.
- 624 71. Ohta M, Matsui K, Hiratsu K, Shinshi H, Ohme-Takagi M. Repression domains of class  
625 II ERF transcriptional repressors share an essential motif for active repression. *Plant*  
626 *Cell.* 2001;13:1959-1968.
- 627 72. Maruyama Y, Yamoto N, Suzuki Y, Chiba Y, Yamazaki KI, Sato T. et al. The  
628 *Arabidopsis* transcriptional repressor ERF9 participates in resistance against  
629 necrotrophic fungi. *Plant Sci.* 2013;213: 79–87.
- 630 73. Chini A, Fonseca S, Fernandez G, Adie B, Chico JM, Lorenzo. et al. The JAZ family of  
631 repressors is the missing link in jasmonate signalling. *Nature.* 2007;448: 666-671.
- 632 74. Chung HS, Howe GAA. Critical role for the TIFY motif in repression of jasmonate  
633 signaling by a stabilized splice variant of the JASMONATE ZIM-domain protein  
634 JAZ10 in *Arabidopsis*. *Plant Cell.* 2009;21: 131-145.
- 635 75. Chung HY, Sunter G. Interaction between the transcription factor AtTIFY4B and  
636 begomovirus AL2 protein impacts pathogenicity. *Plant Mol. Biol.* 2014;86: 185–200.
- 637 76. Stange, C. Plant-virus interactions during the infective process. *Cienciae*  
638 *investigacion agraria.* 2006;33: 1–18.
- 639 77. Liu JZ, Whitham SA. Over expression of a soybean nuclear localized type–III DnaJ  
640 domain-containing HSP40 reveals its roles in cell death and disease resistance. *Te plant*  
641 *journal.* 2013; 74: 110–121.
- 642 78. Taguwa S, Maringer K, Li X, Bernal-Rubio D, Rauch JN, Gestwicki JE. et al. Defining  
643 Hsp70 subnetworks in dengue virus replication reveals key vulnerability in favivirus  
644 infection. *Cell.* 2015;163:1108–1123.
- 645 79. Mandadi KK, Scholthof KBG. Plant immune responses against viruses: how does a  
646 virus cause disease? *Te plant cell.* 2013;25: 1489–1505.
- 647 80. Sánchez-Durán MA, Dallas MB, Ascencio-Ibanez JT, Reyes MI, Arroyo-Mateos M,  
648 Ruiz-Albert J. Interaction between geminivirus replication protein and the SUMO-



- 649 conjugating enzyme is required for viral infection. *Journal of virology*. 2011;85: 9789–  
650 9800.
- 651 81. Eini O, Dogra S, Selth LA, Dry IB, Randles JW, Rezaian MA. Interaction with a host  
652 ubiquitin-conjugating enzyme is required for the pathogenicity of a geminiviral DNA  $\beta$   
653 satellite. *Molecular plant-microbe interactions*.2009;22: 737–746.
- 654 82. Zhang Y, Zhao L, Zhao J, Li Y, Wang J, Guo R et al. S5H/DMR6 encodes a salicylic  
655 acid 5-hydroxylase that fine-tunes salicylic acid homeostasis. *Plant*  
656 *Physiology*.2017;175: 1082–1093.
- 657 83. De Toledo Thomazella DP, Brail Q, Dahlbeck D, Staskawicz BJ. CRISPRCas9  
658 mediated mutagenesis of a DMR6 ortholog in tomato confers broadspectrum disease  
659 resistance. *BioRxiv*. 2016. doi: 10.1101/064824.
- 660 84. Liu Na, Zhang G, Xu S, Mao W, Hu Q, Gong Y. Comparative Transcriptomic Analyses  
661 of Vegetable and Grain Pea (*Pisum sativum* L.) Seed Development. *Frontiers in Plant*  
662 *Science*. 2015; 6:1039.
- 663 85. Gallardo K, Firnhaber C, Zuber H, Hericher D, Belghazi M, Henry C et al. A combined  
664 proteome and transcriptome analysis of developing *Medicago truncatula* seeds. *Mol.*  
665 *Cell. Proteom*. 2007;6: 2165–2179.
- 666 86. Benedito VA, Jerez IT, Murray JD, Andriankaja A, Allen S, Kakar K et al. A gene  
667 expression atlas of the model legume *Medicago truncatula*. *Plant J*. 2008;55: 504–513.
- 668 87. Zhang Y, Liang W, Shi J, Xu J, Zhang D. *MYB56* encoding a R2R3 MYB transcription  
669 factor regulates seed size in *Arabidopsis thaliana*. *Journal of Integrative Plant*  
670 *Biology*. 2013;55: 1166–1178.
- 671 88. Xu W, Purugganan MM, Polisensky DH, Antosiewicz DM, Fry SC, Braam J.  
672 *Arabidopsis* TCH4, regulated by hormones and the environment, encodes a xyloglucan  
673 endotransglycosylase. *Plant Cell*.1995;7: 1555–1567.
- 674 89. Li N, Li Y. Ubiquitin-mediated control of seed size in plants. *Frontiers in Plant*  
675 *Science*.2014;5: 332.
- 676 90. Takenaka Y, Kato Kohei, Ogawa-Ohnishi M, Tsuruhama K, Kajiura H, Yagy K et al.  
677 Pectin RG-I rhamnosyltransferases represent a novel plant-specific glycosyltransferase  
678 family. *Nat Plants*. 2018;4: 669-676.
- 679 91. Cao D, Hussain A, Cheng H, Peng J. Loss of function of four DELLA genes leads to  
680 light- and gibberellin-independent seed germination  
681 in *Arabidopsis*. *Planta*. 2005;223: 105–113.
- 682 92. Tobimatsu Y, Chen F, Nakashima J, Luis L, Trevino E, Jackson L. et al. Coexistence  
683 but independent Biosynthesis of Catechyl and Guaiacyl/Syringyl Lignin Polymers in  
684 Seed Coats. *The Plant Cell*.2013;25: 2587-2600.
- 685 93. YuA, WangZ, Zhang Y, Li F, Liu A. Global Gene Expression of Seed Coat Tissues  
686 Reveals a Potential Mechanism of Regulating Seed Size Formation in Castor Bean. *Int.*  
687 *J. Mol. Sci*.2019;20: 1282.
- 688 94. Figueiredo DD, Köhler C. Signalling events regulating seed coat development.  
689 *Biochemical Society Transactions*. 2014; 42: 358–363.
- 690 95. Adamski NM, Anastasiou E, Eriksson S, O’Neill CM, Lenhard M. Local maternal  
691 control of seed size by KLUH/CYP78A5-dependent growth signaling. *Proceedings of*  
692 *the National Academy of Sciences,USA*. 2009;106: 20115–20120.
- 693 96. Jin D, Wu M, Li B, Bucker B, Keil P, Zhang S et al. The COP9 signalosome regulates  
694 seed germination by facilitating protein degradation of RGL2 and ABI5. *PLoS*  
695 *Genet*.2018;14:e1007237.

- 696 97. Godiard L, Sauviac L, Torii KU, Grenon O, Mangin B, Grimsley NH et al. ERECTA,  
697 an LRR receptor-like kinase protein controlling development pleiotropically affects  
698 resistance to bacterial wilt. *Plant J.* 2003;36: 353-365.
- 699 98. Llorente F, Alonso-Blanco C, Sanchez-Rodriguez C, Jorda L, Molina A. ERECTA  
700 receptor-like kinase and heterotrimeric G protein from *Arabidopsis* are required for  
701 resistance to the necrotrophic fungus *Plectosphaerella cucumerina*. *Plant J.* 2005;43:  
702 165-180.
- 703 99. Sanchez-Rodriguez C, Estevez JM, Llorente F, Blanco CH, Jorda L, Pagan I et al. The  
704 ERECTA receptor-like kinase regulates cell wall-mediated resistance to pathogens in  
705 *Arabidopsis thaliana*. *Mol. Plant Microbe Interact.* 2009;22: 953-963.
- 706 100. Yang H, Gou X, He K, Xi D, Du J, Lin H. et al. BAK1 and BKK1 in *Arabidopsis*  
707 *thaliana* confer reduced susceptibility to *turnip crinkle virus*. *Eur. J. Plant*  
708 *Pathol.* 2010;127: 149–156.
- 709 101. Wang Y, Bouwmeester K, Beseh P, Shan W, Govers F. Phenotypic analyses of  
710 *Arabidopsis* T-DNA insertion lines and expression profiling reveal that multiple L-type  
711 lectin receptor kinases are involved in plant immunity. *Mol. Plant Microbe Interact.*  
712 2014;27: 1390-1402.
- 713 102. Shi H, Shen Q, Qi Y, Yan H, Nie H, Chen Y et al. BR-SIGNALING KINASE1  
714 Physically Associates with FLAGELLIN SENSING2 and Regulates Plant Innate  
715 Immunity in *Arabidopsis*. *The Plant Cell.* 2013;25: 1143–1157.
- 716 103. Vij S, Tyagi AK. Genome-wide analysis of the stress associated protein (SAP) gene  
717 family containing A20/AN1 zinc-finger(s) in rice and their phylogenetic relationship  
718 with *Arabidopsis*. *Mol. Genet. Genomics.* 2006; 276:565-575.
- 719 104. Lumba S, Cutler S, McCourt P. Plant nuclear hormone receptors: a role for small  
720 molecules in protein– protein interactions. *Annu Rev Cell Dev Biol.* 2010;26: 445–469.
- 721 105. Kim MJ, Ham BK, Kim HR, Lee IJ, Kim YJ, Ryu KH et al. In vitro and in planta  
722 interaction evidence between *Nicotiana tabacum* thaumatin-Like protein 1 (TLP1) and  
723 *cucumber mosaic virus* proteins. *Plant Mol Biol.* 2005;59: 981–994.
- 724 106. Merkouropoulos G, Andreasson E, Hess D, Boller T, Peck SC. An *Arabidopsis* protein  
725 phosphorylated in response to microbial elicitation, AtPHOS32, is a substrate of MAP  
726 kinases 3 and 6. *J. Biol. Chem.* 2008;283: 10493–10499.
- 727 107. Liu JX, Srivastava R, Che P, Howell SH. An endoplasmic reticulum stress response in  
728 *Arabidopsis* is mediated by proteolytic processing and nuclear relocation of a membrane-  
729 associated transcription factor, bZIP28. *The Plant Cell.* 2007a;19: 4111–4119.
- 730 108. Liu JX, Srivastava R, Che P, Howell SH. Salt stress responses in *Arabidopsis* utilize a  
731 signal transduction pathway related to endoplasmic reticulum stress signaling. *The Plant*  
732 *Journal.* 2007b;51: 897–909.
- 733 109. Lee DH, Park SJ, Ahn CS, Pai HS. MRF family genes are involved in translation  
734 control, especially under energy-deficient conditions, and their expression and functions  
735 are modulated by the TOR signaling pathway. *Plant Cell.* 2017;29:2895-2920.
- 736 110. Moran TV, Walker JC. Molecular cloning of two novel protein kinase genes from  
737 *Arabidopsis thaliana*. *Biochim. Biophys. Acta.* 1993;1216:9-14.
- 738 111. Monaghan J, Matschi S, Shorinola O, Rovenich H, Matei A, Segonzac C et al. The  
739 calcium-dependent protein kinase CPK28 buffers plant immunity and regulates BIK1  
740 turnover. *Cell Host Microbe.* 2014;16: 605-615.
- 741 112. Shin D, Moon SJ, Han S, Kim BG, Park SR, Lee SK et al. Expression of StMYB1R-1,  
742 a novel potato single MYB-like domain transcription factor, increases drought tolerance.  
743 *Plant Physiol.* 2011;155:421-432.
- 744 113. Yamaguchi-Shinozaki K, Koizumi M, Urao S, Shinozaki K. Molecular cloning and  
745 characterization of 9 cDNAs for genes that are responsive to desiccation in *Arabidopsis*



- 746 *thaliana*: sequence analysis of one cDNA clone that encodes a putative transmembrane  
747 channel protein. *Plant Cell Physiol.* 1992;33: 217-224.
- 748 114. Tran LSH, Nakashima K, Sakuma Y, Simpson SD, Fujita Y, Maruyama K et al.  
749 Isolation and functional analysis of *Arabidopsis* stress-inducible NAC transcription  
750 factors that bind to a drought-responsive cis-element in the early responsive to  
751 dehydration stress 1 promoter. *Plant Cell.* 2004;16:2481-2498.
- 752 115. Krattinger SG, Sucher J, Selter LL, Chauhan H, Zhou B, Tang M et al. The wheat  
753 durable, multipathogen resistance gene Lr34 confers partial blast resistance in rice. *Plant*  
754 *Biotechnology Journal.* 2016;14: 1261–1268.
- 755 116. Kim MJ, Kim HR, Paek KH. *Arabidopsis* tonoplast proteins TIP1 and TIP2 interact  
756 with the cucumber mosaic virus 1a replication protein. *Journal of general*  
757 *virology.* 2006;87: 3425–343.
- 758 117. Taji T, Ohsumi C, Iuchi S, Seki M, Kasuga M, Kobayashi M et al. Important roles of  
759 drought- and cold-inducible genes for galactinol synthase in stress tolerance in  
760 *Arabidopsis thaliana*. *Plant J.* 2002;29:417-426.
- 761

## 762 **Legends to the figure**

763 **Figure 1.** Heat Map showing differential expression pattern of top 100 coding sequences  
764 (CDS) of TU94-2 cultivar and Trombay wild (TW) blackgram. Green colour denotes down-  
765 regulation and red colour denotes up-regulation of CDS.

766 **Figure 2.** Validation of RNA-Seq result with RT PCR. Expression of 22 randomly selected  
767 genes was examined by RT- PCR analysis. a) Expression pattern of 15 up-regulated genes and  
768 b) Expression pattern of 7 down-regulated genes. For each gene, fold changes were calculated  
769 by  $\Delta\Delta C_t$  method in the RT-PCR, converted to log values and with the FPKM values (log FPKM  
770 TW/TU94-2) in the RNA-Seq.  
771

772 **Figure 3.** Expression levels of twenty genes found up-regulated in TW non-infested developing  
773 seeds. The expression levels were normalized with the help of EF1 $\alpha$  gene of blackgram.  
774 Expression levels were calculated by  $\Delta\Delta C_t$  method in the RT-PCR but not converted to log  
775 values. a) and b) showed Fold changes obtained only from qPCR experiments and calculated  
776 through  $\Delta\Delta C_t$  method. Full names of genes abbreviations were given in primer details Table 2.  
777 Bars represent mean  $\pm$  standard deviation.

778 **Figure 4.** Venn diagram showing up-regulated DEGs of TW and TU94-2 blackgram genotypes  
779 related to bruchids pest and geminivirus interaction.

780

781

782

783

784

**Table 1.** DEGs found (RNA-Seq) to be upregulated in developing seeds of TW wild accession and TU94-2 cultivar involved in pests (Bruchids) and pathogens (Geminiviruses) defense responses.

| <b>TW Wild accession</b> | <b>Fold change*</b> | <b>Annotation through NCBI nr database</b>                                   | <b>Function/role</b>                                                                                                                                                      | <b>References</b> |
|--------------------------|---------------------|------------------------------------------------------------------------------|---------------------------------------------------------------------------------------------------------------------------------------------------------------------------|-------------------|
| ESW08346                 | 5.59                | Serine/threonine-protein kinase-like protein At1g28390                       | Perception of pests elicitors (Bruchids)                                                                                                                                  | [17]              |
| ESW35426                 | 3.0                 | L-type lectin-domain containing receptor kinase S.4                          | Perception of pests elicitors (Bruchids)                                                                                                                                  | [1]               |
| ESW07598                 | 3.59                | Transcription factor bHLH87-like                                             | Tomato yellow leaf curl virus ( <i>Solanum lycopersicum</i> ) and CLCuD ( <i>G. arboreum</i> )                                                                            | [40,41]           |
| ESW21986                 | 4.9                 | Hydroperoxide lyase                                                          | Biosynthesis of jasmonic acid and green leaf volatiles that are deterrents to insects/pests                                                                               | [42]              |
| ESW32525                 | 4.1                 | Thaumatococin-like protein/ pathogenesis-related (PR) protein family 5 (PR5) | Gets induced by pathogen/pest attack                                                                                                                                      | [43]              |
| ESW24518                 | 3.8                 | Miraculin-like/Kunitz inhibitor ST1-like                                     | Pests (Bruchids)                                                                                                                                                          | [48]              |
| ESW28909,                | 4.5                 | Vicilin-like seed storage protein and basic 7S                               | <i>Bruchids (C. maculatus)</i>                                                                                                                                            | [49,50]           |
| ESW26115                 | 4.2                 | globulin 2-like                                                              |                                                                                                                                                                           |                   |
| ESW14260                 | 6.4                 | Purple acid phosphatase 18                                                   | Herbivore insects ( <i>Egyptian cotton worm</i> ), bruchids ( <i>Callosobruchus maculatus</i> ), pathogens and nematodes                                                  | [52-56]           |
| <b>TU94-2 Cultivar</b>   |                     |                                                                              |                                                                                                                                                                           |                   |
| XP_003547530             | -3.0                | LRR receptor-like serine/threonine-protein kinase RKF3                       | RLKs/RLPs in plant immunity                                                                                                                                               | [38]              |
| ESW32137,                |                     | Leucine-rich repeat-containing protein                                       | Probable R Proteins                                                                                                                                                       | [41]              |
| XP_003532461,            | -3.2, -             | DDB_G0290503, F-box/LRR-repeat protein                                       |                                                                                                                                                                           |                   |
| ESW12939                 | 3.9,-4.5            | At4g29420, F-box/LRR-repeat protein 4                                        |                                                                                                                                                                           |                   |
| ESW14183                 | -4.0                | Mitogen-activated protein kinase kinase kinase NPK1                          | Resistance gene-mediated responses such as the N-mediated resistance to tobamovirus (TMV) and the Rx-mediated hypersensitive response (HR) to <i>potato virus X</i> (PVX) | [64]              |

|                                                                         |                                         |                                                                                                                                                                               |                                                                                                                                                                                                                     |                 |
|-------------------------------------------------------------------------|-----------------------------------------|-------------------------------------------------------------------------------------------------------------------------------------------------------------------------------|---------------------------------------------------------------------------------------------------------------------------------------------------------------------------------------------------------------------|-----------------|
| XP_003523239,<br>ESW13960,<br>NP_001235145,<br>ESW03344<br>XP_003524734 | -3.5,<br>-3.9,<br>-6.4,<br>-3.1<br>-4.9 | Serine/threonine-protein kinase ATG1t,<br>Autophagy protein 5, Autophagy-related<br>protein 8C, Autophagy-related protein 3<br>Tobamovirus multiplication protein 1<br>(TOM1) | Autophagy.<br>Autophagy-related NbATG8f protein interaction with<br><i>Cotton leaf curl Multan virus</i> CLCuMuB-βC1<br>protein<br>Susceptibility factor but when overexpressed imparts<br>tolerance to tobamovirus | [67]<br>[68,69] |
| AGC26170<br>Host Ubiquitin<br>and proteasome<br>systems                 | -4.7<br>-                               | TIFY 10A<br>E2 activating, conjugating and ligase proteins                                                                                                                    | Induced by wounding, jasmonate and herbivory<br>Degradation of viral proteins (TMV and <i>Turnip<br/>yellow mosaic virus</i> movement proteins)                                                                     | [73,74]<br>[79] |

- Fold change in minus sign signifies down regulation in TW

**Table 2.**Details of Primers used in quantitative real-time PCR experiment of this study

| Primer Code | Annotation                                    | Abbreviation | TW CDS/Contig Number | Forward sequence     | Reverse sequence     |
|-------------|-----------------------------------------------|--------------|----------------------|----------------------|----------------------|
| TWCDS 53    | Golgin subfamily A member 6-like protein 6    | GOG          | CDS 19831            | GCATTTCTGAAGGGCAATA  | AGATTCGGGTTGAAGTGGTG |
| TWCDS 55    | Multiple organellar RNA editing factor 2      | REF          | CDS 24130            | GTTGGCAAGGGTCTTGATGT | CTGGATCTTCGTCCTTCAGC |
| TWCDS 61    | RING-H2 finger protein ATL8-like              | ATL          | CDS 155              | CAGACTCCTCCACTCCCAAG | GCAGCGAATTCACCACTCTC |
| TWCDS 57    | Purple acid phosphatase 18 Antagonist of like | ACP18        | CDS 24088            | CAAACTGGCTTCACGGAAT  | GAAGGTGGGAGAGGAAGGAG |
| TWCDS 58    | heterochromatin protein 1                     | AHP          | CDS 194              | CTTGCAATCTGGCAGAGGTT | ACCTGTTCGATGGAATGCTC |
| TWCDS 52    | Protein Reticulata-related 1, chloroplastic   | RR1          | CDS 16109            | GACGGAGGTGGAGATGAAGA | AAGACAGAGGCCAAGACGAA |
| TWCDS       | EID1-like F-box protein 2                     | EDL2         | CDS 16247            | TGCATTGTGGCAAGAGAAAG | TTTGCCAAACGAGTTCTGTG |

|       |                                                        |        |           |                       |                       |
|-------|--------------------------------------------------------|--------|-----------|-----------------------|-----------------------|
| 47    |                                                        |        |           |                       |                       |
| TWCDS | Prostatic spermine-binding protein                     | PSBP   | CDS 16294 | CCCATCATCACTTCCTCCAC  | AAATGACAGCGGAACTGAGG  |
| 59    |                                                        |        |           |                       |                       |
| TWCDS | Protein PNS1                                           | PNS1   | CDS 5428  | GGGAGAGGAAGGAGGAAGAA  | CAATTGCAGGCACAAAGAGA  |
| 62    |                                                        |        |           |                       |                       |
| TWCDS | Universal stress protein PHOS32 isoform X2             | PHOS32 | CDS 21817 | AGTTGTCTGGCGGAATCAAC  | TCCGAGTCCAATCTTCAAGC  |
| 65    |                                                        | GLYBC  |           |                       |                       |
| TWCDS | Glycosyltransferase BC10                               | 10     | CDS 5677  | CGGAGACGTTGAGATGGAAT  | CGCCCAACCTCACTCATACT  |
| 50    |                                                        |        |           |                       |                       |
| TWCDS | Leucine-rich repeat receptor-like protein kinase       | LRRRL  |           |                       |                       |
| 69    | At1g68400                                              | K      | CDS 15933 | TCGGGGAAACTTGATAATGC  | ACCGACTCGATCTGTCCAAC  |
| 77    |                                                        |        |           |                       |                       |
| TWCDS | Gibberellin receptor                                   | GID1   | CDS 628   | TCTCAGAATCGGGATGGAAG  | CTTGATGGACTTGGGTGTT   |
| 82    | Geranylgeranyl pyrophosphate synthase 7, chloroplastic | GGPS   | CDS 15949 | TCCACCACCTGAAACAACAA  | ATTCGGAAGGAGCCTCAAAT  |
| 66    | 50S ribosomal protein 5, chloroplastic                 | RP50S  | CDS 400   | GATTCGAACTCCGTTGAAGG  | TTCCCTCTTCTCCTGTTGC   |
| 109   | Uncharacterized protein                                | UNC    | CDS_7172  | CACGTCTTGAACCCACCTTT  | CTTCCTCGTGTGTTTCGTCAA |
| 85    | Putative MO25-like protein                             | MO25   | CDS_15921 | TTAAAAGTTGCCCCAGCATC  | TGGCTACGAAAACATGGACA  |
| 87    | At5g47540                                              |        |           |                       |                       |
| TWCDS | Exocyst complex component                              | SEC15A | CDS_7873  | GCTTGACCAGGGATTCATGT  | GTGGGTCTTGACATCTCCT   |
| 96    | SEC15A                                                 |        |           |                       |                       |
| TWCDS | E3 ubiquitin-protein ligase                            | E3LIG  | CDS_915   | CCTTATCATCGGTTGGAAGC  | TGTGCCATTTGCAAAGATGT  |
| 97    | Praja-2                                                |        |           |                       |                       |
| TWCDS | Galactinol synthase 1 isoform                          | GALS   | CDS_20974 | TGCAAACGATGTGGGAGTAG  | TATTGCCAGCAGTGTCCAGA  |
| 101   | X1                                                     |        |           |                       |                       |
| TWCDS | Protein IQ-DOMAIN 31                                   | IQ-D   | CDS_6013  | TCCCCAACTCCTTGATTTTT  | AAGATTTGACGGTGGCAAAG  |
| 101   | isoform X2                                             |        |           |                       |                       |
| TWCDS | Kinesin-like protein KIN-7D,                           | KIN    | CDS_5448  | AGCCATTGGTTGTTTCGTCTC | ATTTCTGCGGCATATTGGAC  |

|         |                             |        |              |                      |                       |
|---------|-----------------------------|--------|--------------|----------------------|-----------------------|
| 106     | mitochondrial               |        |              |                      |                       |
| TWCDS   | Ubiquitin-activating enzyme |        |              |                      |                       |
| 107     | E1 1-like                   | UBIACT | CDS_24831    | ATTTGGCTCCAAGTGTTCCA | GTTGGCCCTGAAACTGAAAA  |
|         |                             | ASPPCS |              |                      | GTCGAACTCCACCCACAGAT  |
| ASPPCS1 | Aspartic proteinase gene    | 1      | Contig 15886 | CGAGAAAGGCGTGGAGATAG |                       |
| GLO7S   | Globin 7S                   | GLO7S  | Contig 23594 | TGCTTTCGGTATCAATGCTG | TCTTCCCTTATGCCCTTCCT  |
| CHI     | Chitin                      | CHI    | Contig 14857 | TTCGACCAGATGCTCAAACA | AGACGTTTGTCCGAAGAAGG  |
| ACP     | Acid Phosphatase            | ACP    | Contig 19934 | GGGGATGGGGGTAATAGAGA | CAAAGCCCACGTTTCATTTT  |
|         | Epidermis specific secreted |        | Contig 3818  | TTGGTTTTGGAGCGTAAAGG | GTTGCCACTGGTGGGAAGAAT |
| EP1     | glycoprotein                | EP1    |              |                      |                       |

---

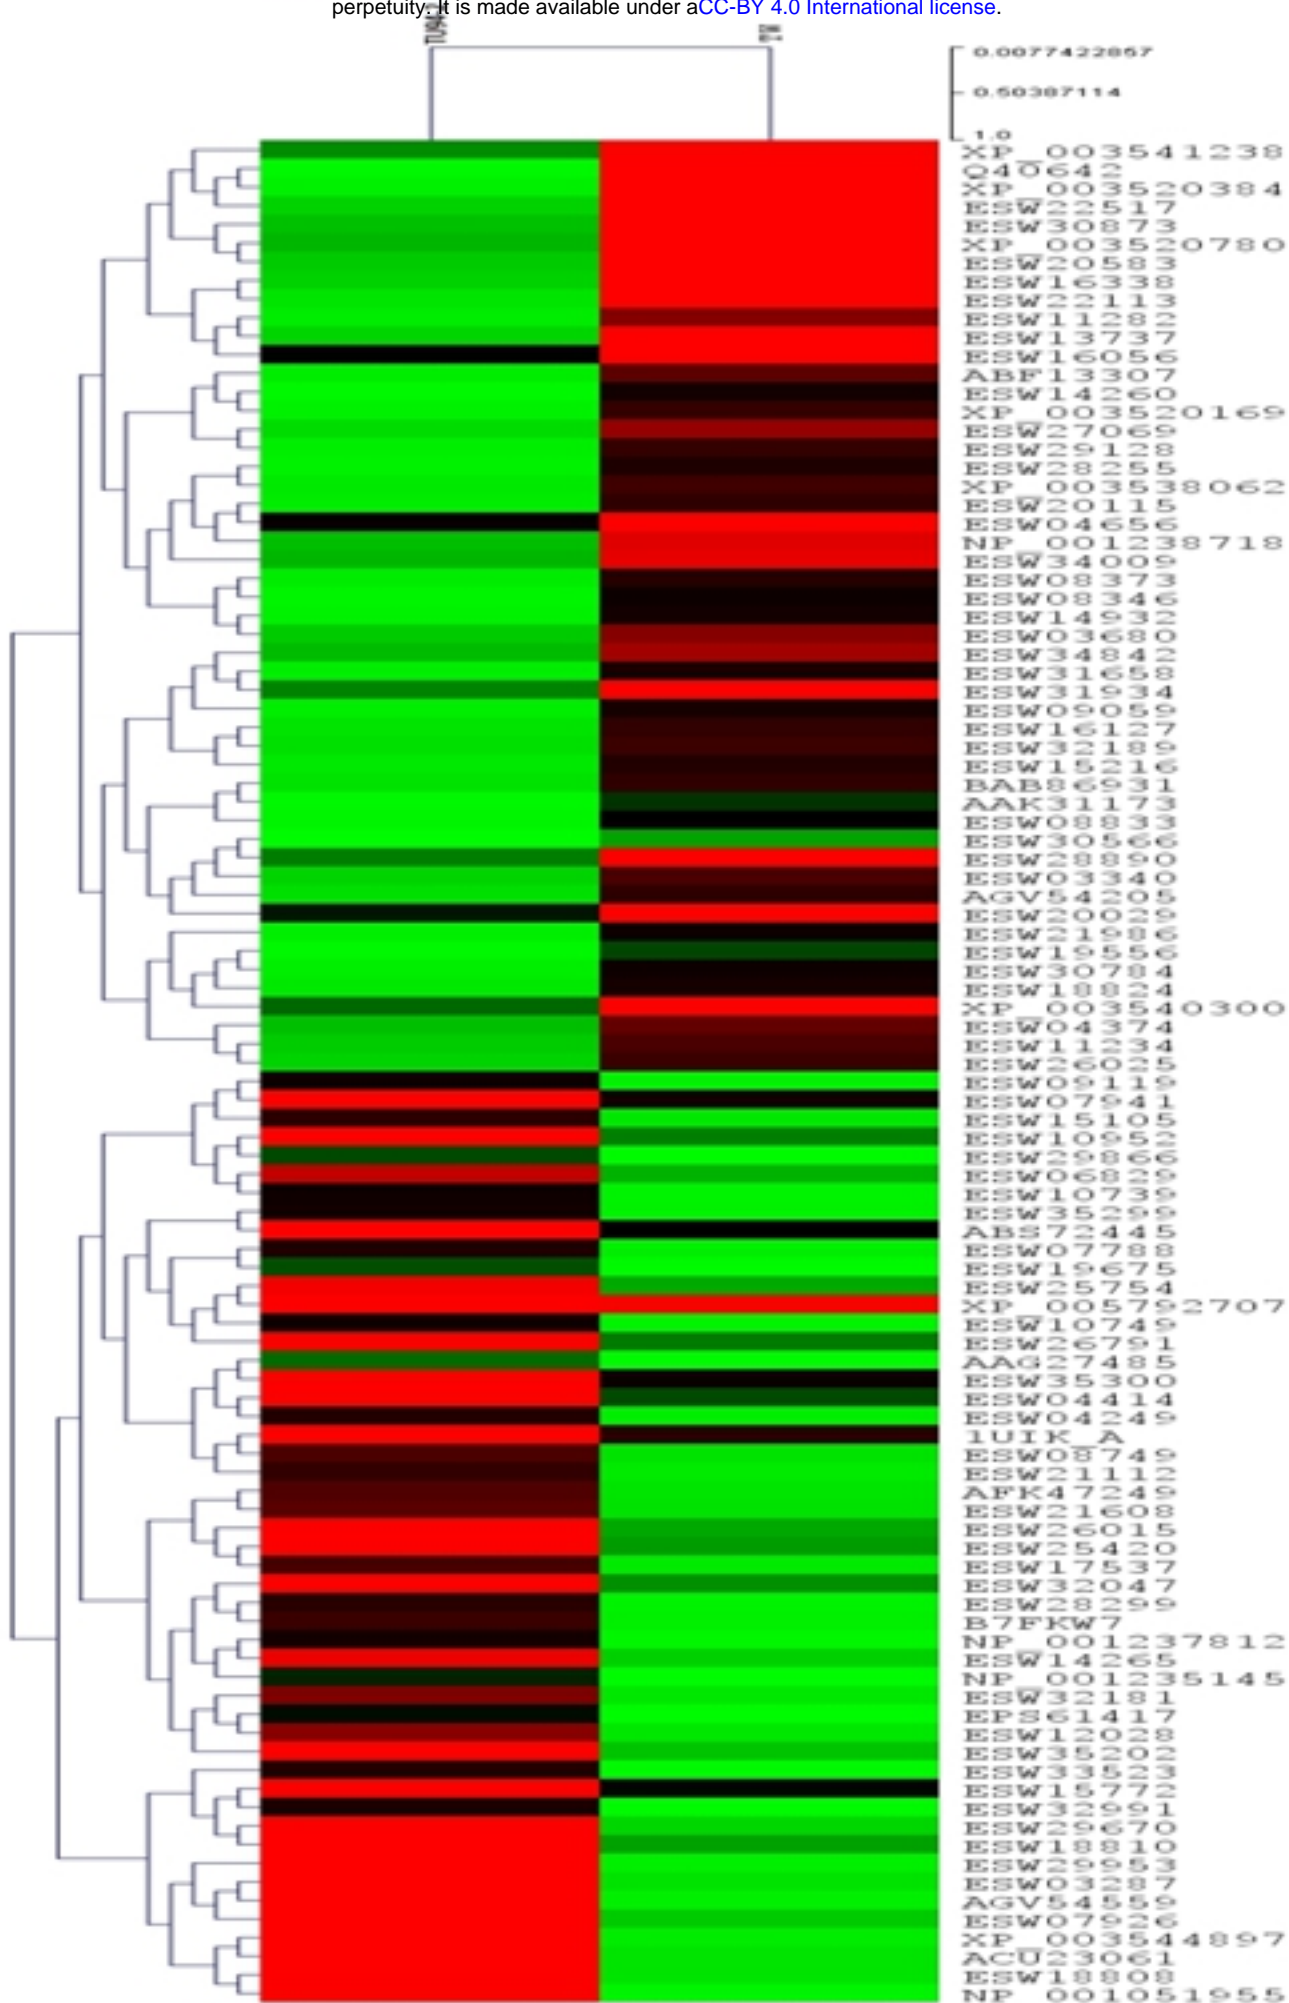

Figure



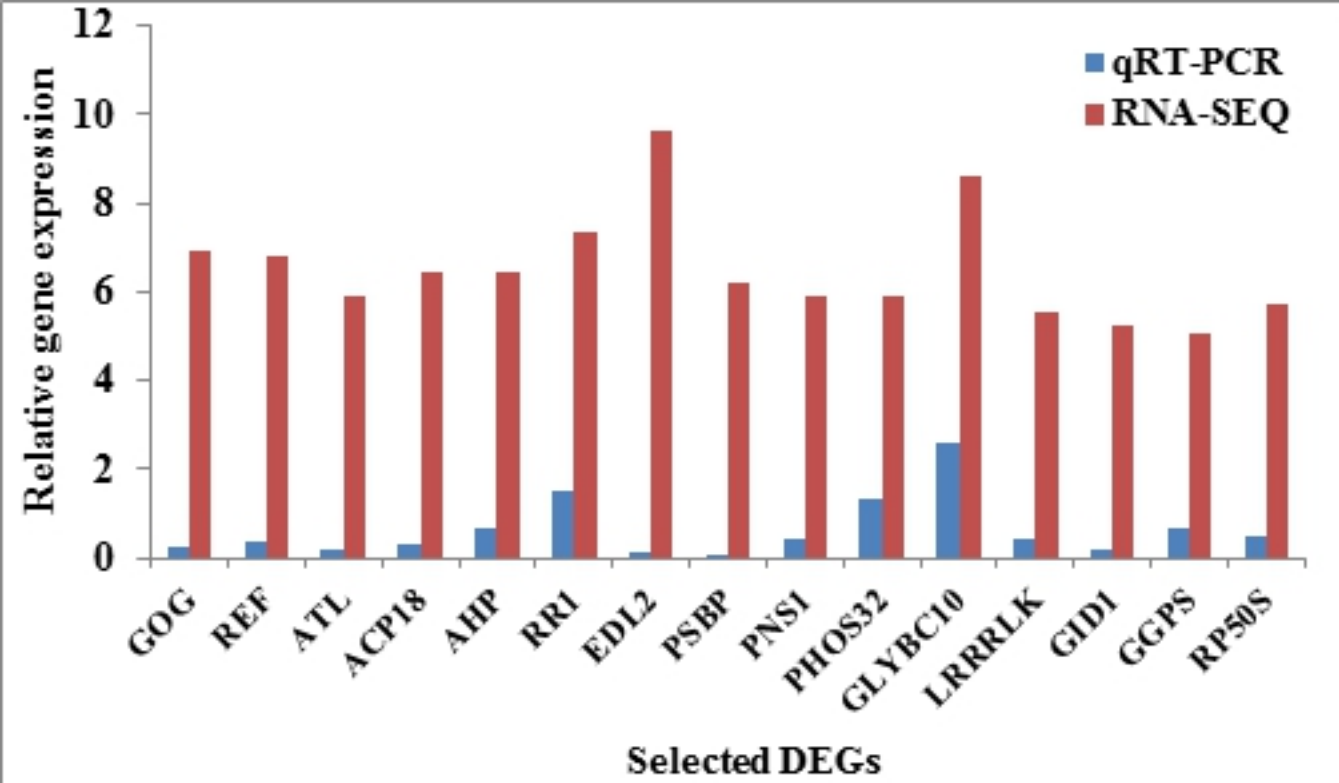

Figure

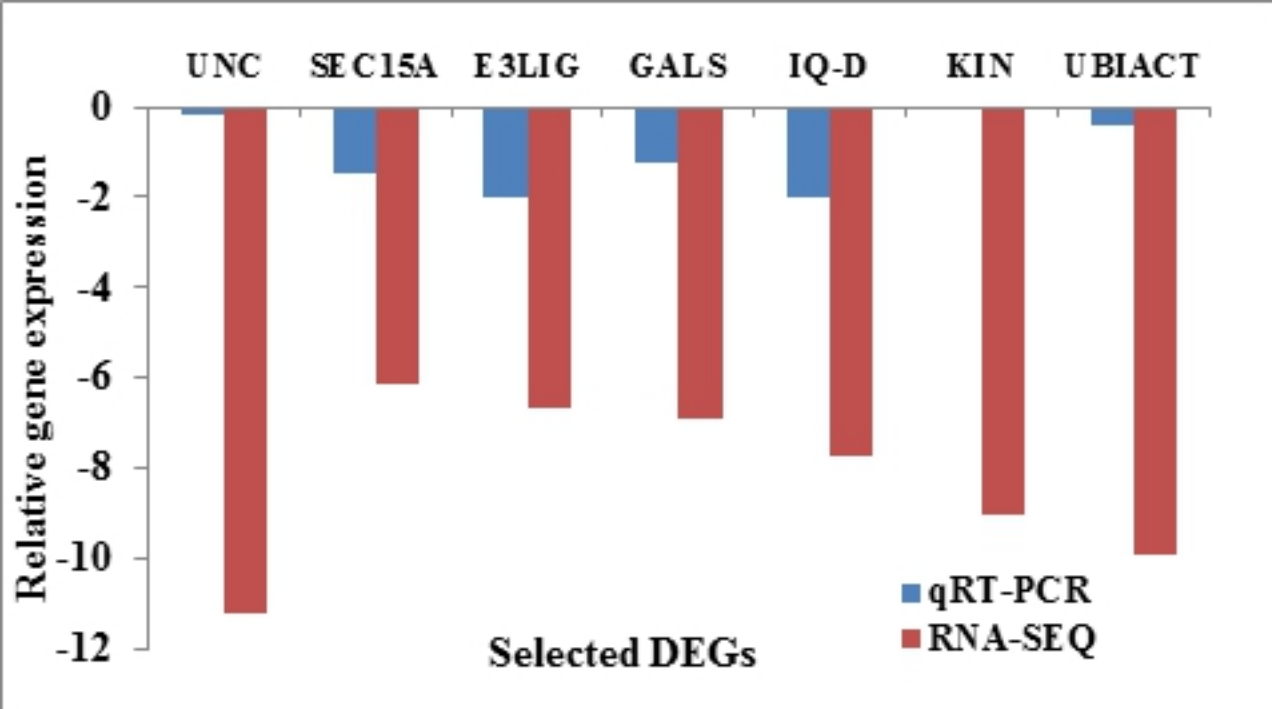

Figure

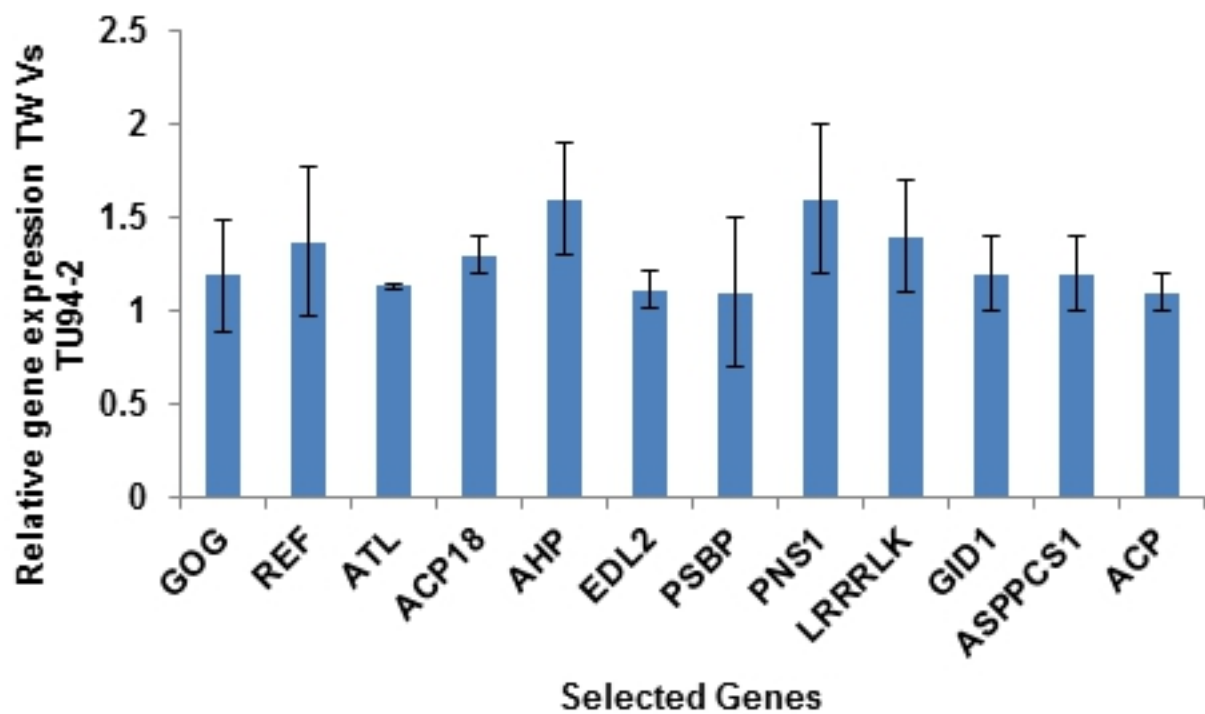

Figure

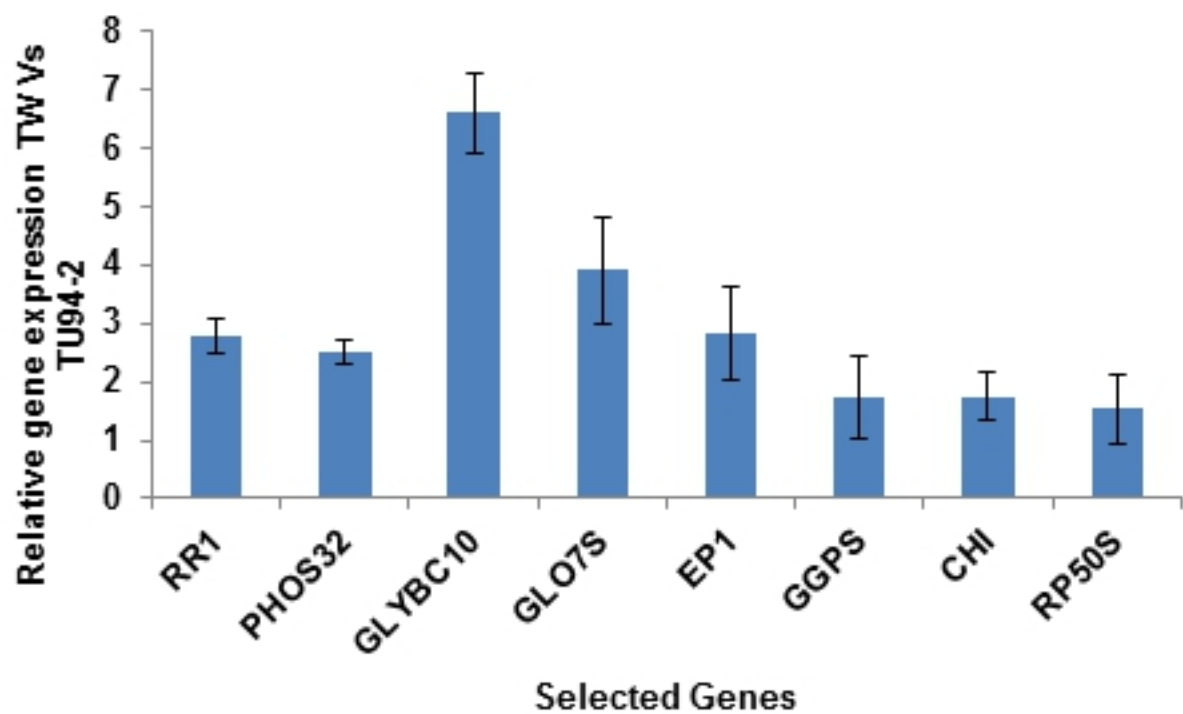

Figure

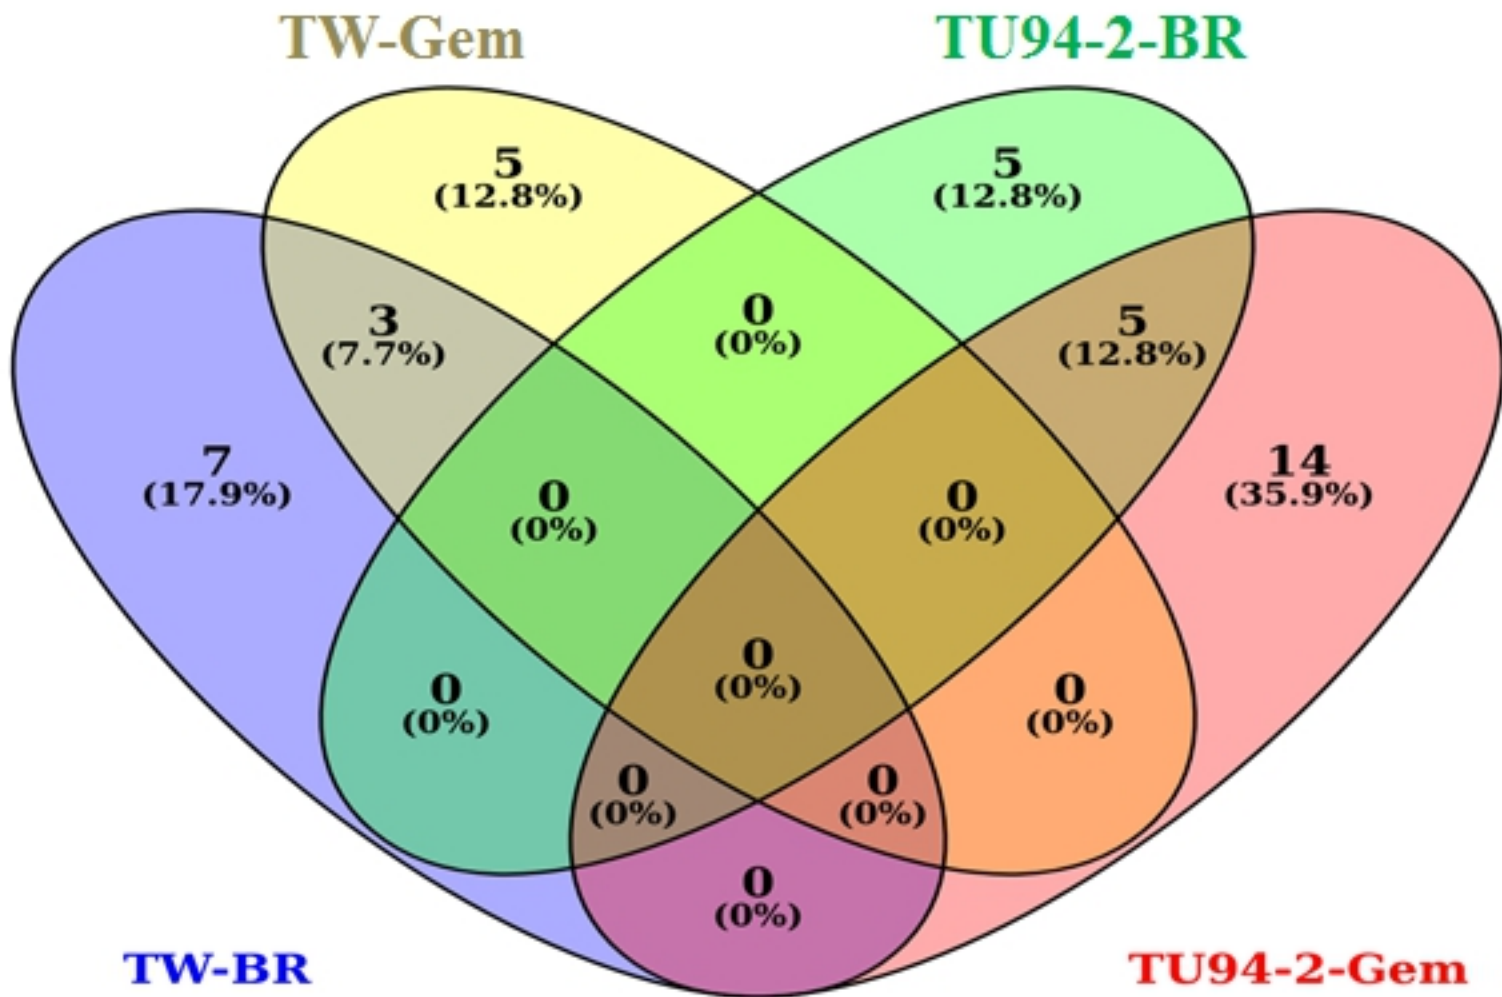

Figure
